# Supplementary material for: Indoleamine 2,3-dioxygenase 1 regulates cell permissivity to astrovirus infection
Source: PubMed Central journal article supplement — Mucosal Immunol. Author manuscript; Available in PMC 2023 Sep 27. (PMC10528345; doi:10.1016/j.mucimm.2023.05.011), 2023-06-07
Supplement: NIHMS1923873-supplement-1.pdf [file NIHMS1923873-supplement-1.pdf]

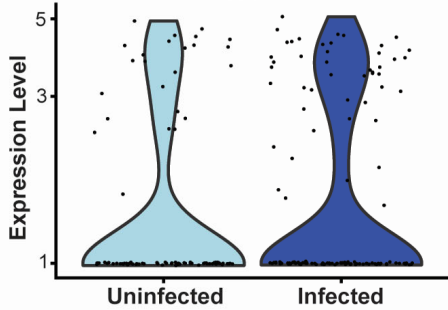

**Supplemental Fig. 1 Relative expression of Ido1 in goblet cells from uninfected and infected animals.** Analysis is from scRNA-seq dataset of duodenal epithelial cells collected at 6 dpi (n=4 animals/group).

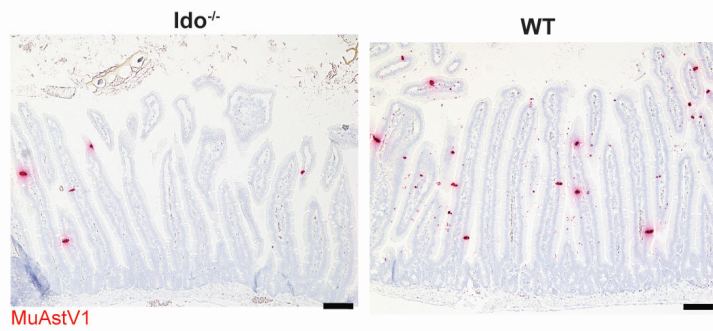

**Supplemental Fig. 2 MuAstV1-positive staining of goblet cells in *Ido*<sup>-/-</sup> and WT animals.** Tissue sections of duodenum collected at 6 dpi (n=2 animals/group) show that goblet cells are targeted in both groups of infected animals. Scale bar= 100μm

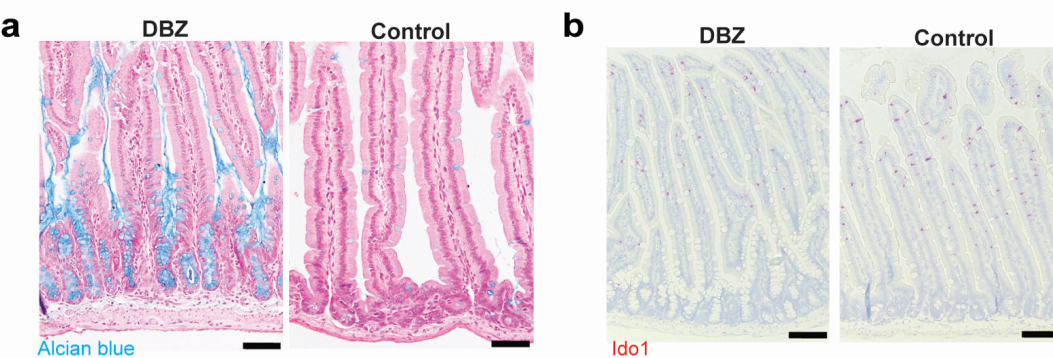

**Supplemental Fig. 3 Control histology for DBZ treatments in WT animals.**

a) Tissue sections of duodenum collected prior to infection (n=2 animals/group) show that DBZ induces goblet cells hyperplasia based on alcian blue, scale bar = 60μm. b) DBZ treatment does not induce an increase in Ido1-expressing goblet cells based on Ido1 ISH, scale bar = 100μm.

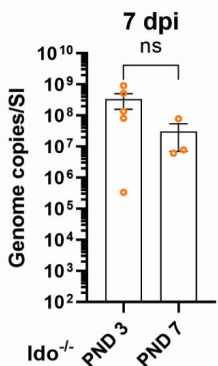

**Supplemental Fig. 4 MuAstV1 infection in neonatal *Ido*<sup>-/-</sup> animals.** Neonatal mice infected at the post-natal days indicated had comparable virus levels detected in small intestines collected at 7 dpi. Comparison between groups was assessed by Mann-Whitney U. ns, non-significant.

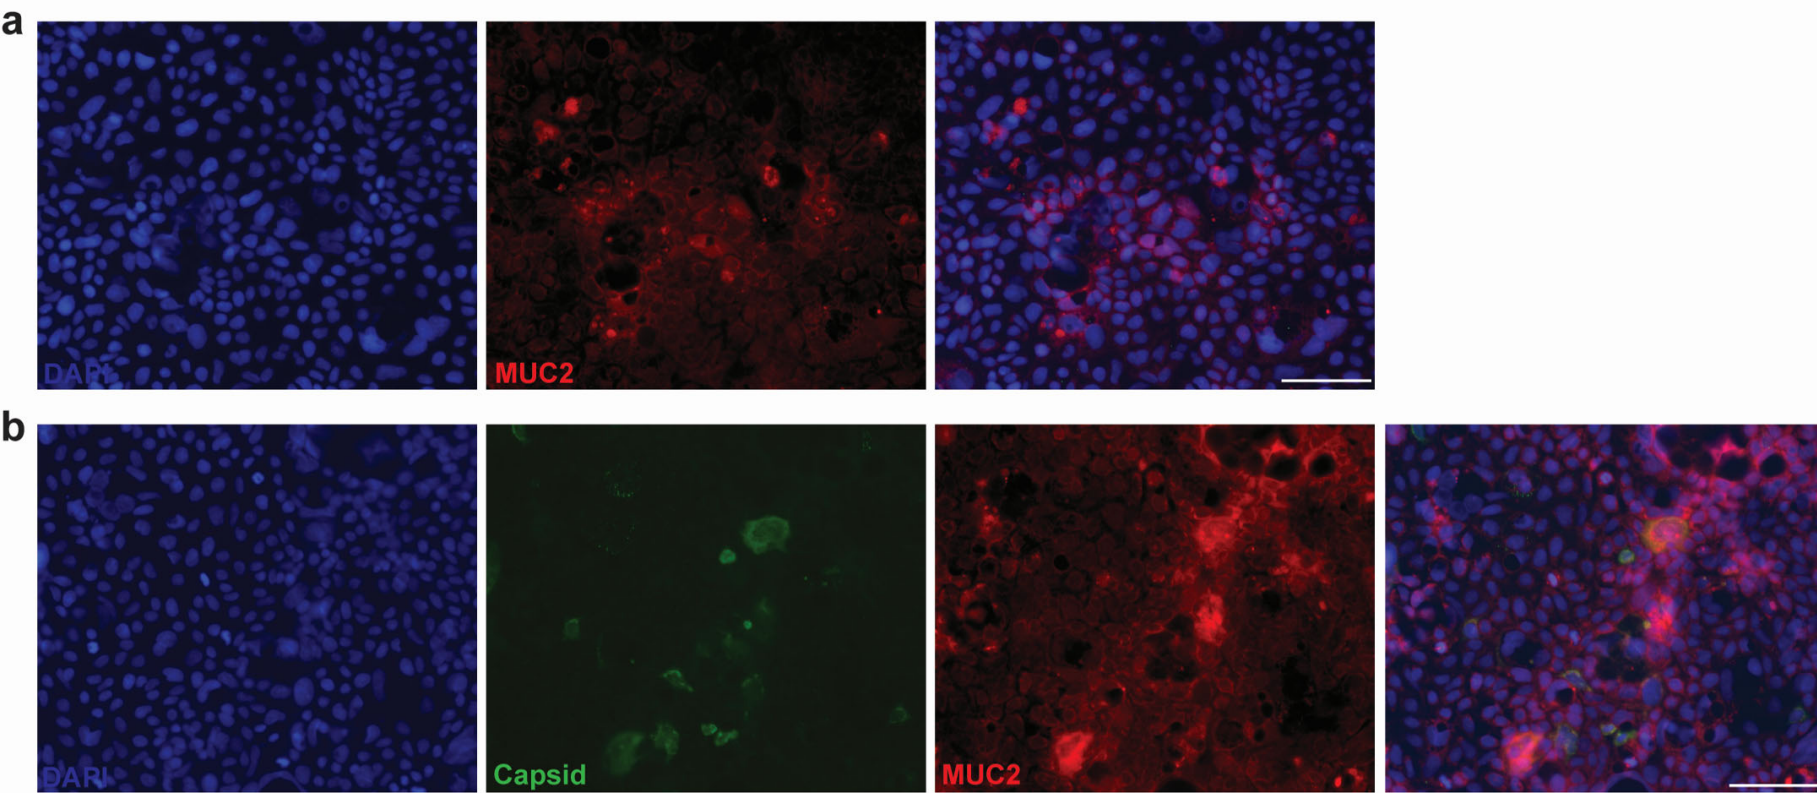

**Supplemental Fig. 5 Muc2-positive Caco-2 cells are infected by HAstV1 .**

a) Caco-2 cells were cultured for 7 days before harvested and stained for MUC2 (red) and DAPI (blue). b) Caco-2 cells were infected with HAstV1 (MOI=0.1) at 6 days post-plating and harvested 24 hours following infection. Scale bar=90  $\mu$ m. Data represent individual wells run in at least 2 independent experiments.
